# Supplementary material
Source: HighWire-hosted journal article supplement (https://www.ajevonline.org/highwire/filestream/12647/field_highwire_adjunct_files/0/SupplementalData.pdf)
Supplement: SupplementalData.pdf [file SupplementalData.pdf]

**Supplemental Data for:**

Englezos V, Di Gianvito P, Peyer L, Giacosa S, Río Segade S, Edwards N, Rolle L, Rantsiou K and Cocolin L. Bioprotective effect of *Pichia kluyveri* and *Lactiplantibacillus plantarum* in winemaking conditions. Am J Enol Vitic 73:294-307. doi: 10.5344/ajev.2022.22008.

**Supplemental Table 1** Chemical parameters of wines produced by the different inoculation protocols in 2020.

| Metabolites <sup>a</sup>                       | Control1                   | Control2              | AFPK                  | AFLP                 | Sig <sup>b</sup> |
|------------------------------------------------|----------------------------|-----------------------|-----------------------|----------------------|------------------|
| Residual sugars (g/L)                          | <2.0                       | <2.0                  | <2.0                  | <2.0                 | -                |
| Acetic acid (g/L)                              | 0.19 ± 0.01 c <sup>c</sup> | 0.24 ± 0.01 d         | 0.11 ± 0.02 b         | 0.07 ± 0.01 a        | ***              |
| Glycerol (g/L)                                 | 11.52 ± 0.03 b             | 10.77 ± 0.27 a        | 12.07 ± 0.02 c        | 11.72 ± 0.17 b       | ***              |
| Ethanol (% v/v)                                | 13.55 ± 0.02 a             | 13.86 ± 0.01 b        | 13.84 ± 0.01 b        | 13.83 ± 0.03 b       | ***              |
| L-Malic acid (g/L)                             | 3.02 ± 0.09 b              | 3.05 ± 0.12 b         | 2.97 ± 0.43 b         | 2.10 ± 0.11 a        | ***              |
| D-Lactic acid (g/L)                            | 0.29 ± 0.04 b              | 0.39 ± 0.02 b         | 0.25 ± 0.06 b         | 0.13 ± 0.04 a        | ***              |
| L-Lactic acid (g/L)                            | 0.05 ± 0.04 a              | 0.09 ± 0.02 a         | 0.11 ± 0.06 a         | 1.05 ± 0.04 b        | ***              |
| Glycerol yield <sup>d</sup>                    | 0.049 ± 0.001 b            | 0.046 ± 0.001 a       | 0.051 ± 0.001 c       | 0.05 ± 0.001 b       | ***              |
| Ethanol yield <sup>e</sup>                     | 0.057 ± 0.002 a            | 0.059 ± 0.002 b       | 0.059 ± 0.001 b       | 0.059 ± 0.001 b      | ***              |
| pH                                             | 3.47 ± 0.01 e              | 3.36 ± 0.02 a         | 3.41 ± 0.02 b         | 3.46 ± 0.02 b        | ***              |
| Total acidity (g/L as tartaric acid)           | 7.16 ± 0.17 a              | 8.15 ± 0.15 b         | 7.36 ± 0.09 a         | 7.02 ± 0.02 a        | ***              |
| Total anthocyanins (mg/L) <sup>f</sup>         | 59.0 ± 5.0                 | 56.6 ± 1.8            | 57.8 ± 2.0            | 59.8 ± 1.1           | NS               |
| Total flavonoids (mg/L) <sup>g</sup>           | 643 ± 45                   | 719 ± 16              | 652 ± 24              | 659 ± 12             | NS               |
| Non-anthocyanin flavonoids (mg/L)              | 557 ± 38 a                 | 637 ± 14 b            | 567 ± 21 a            | 571 ± 11 a           | *                |
| L*                                             | 65.95 ± 0.10 b             | 64.91 ± 0.65 a        | 64.32 ± 0.50 a        | 64.81 ± 0.29 a       | ***              |
| a*                                             | 41.54 ± 0.32 a             | 44.31 ± 0.24 c        | 43.60 ± 0.13 b        | 44.29 ± 0.44 c       | ***              |
| b*                                             | 20.87 ± 0.12 a             | 22.70 ± 0.02 b        | 21.13 ± 0.16 a        | 21.15 ± 0.11 a       | ***              |
| Color intensity (a.u., 10 mm OP <sup>h</sup> ) | 1.57 ± 0.01 a              | 1.66 ± 0.03 b         | 1.66 ± 0.03 b         | 1.64 ± 0.02 b        | ***              |
| Color hue                                      | 0.80 ± 0.02 b              | 0.77 ± 0.01 b         | 0.77 ± 0.02 b         | 0.75 ± 0.01 a        | ***              |
| Butanol                                        | 10.61 ± 2.5                | blq <sup>i</sup>      | blq                   | blq                  | NS               |
| Hexanol <sup>j</sup>                           | 1725.25 ± 64.87 bc         | 1578.21 ± 67.87 bc    | 1212.53 ± 50.96 a     | 1827.41 ± 16.26 c    | ***              |
| Isoamyl alcohol <sup>#</sup>                   | 250712.18 ± 6638.55 c      | 6529.74 ± 3086.02 a   | 75029.04 ± 21162.87 b | 74376.95 ± 6119.94 b | ***              |
| Isobutanol                                     | 721.44 ± 96.06 c           | 297.92 ± 36.92 ab     | 326.35 ± 83.45 ab     | 368.28 ± 16.22 ab    | ***              |
| Octanol <sup>#</sup>                           | 4.51 ± 0.32 c              | 3.7 ± 0.4 b           | 2.42 ± 0.13 a         | 3 ± 0.11 a           | ***              |
| 3-ethoxypropanol                               | 14.65 ± 1.23 ab            | blq                   | 10.79 ± 2.28 a        | 17.69 ± 0.69 c       | ***              |
| 1-propanol                                     | 60.95 ± 1.3 a              | 64.49 ± 12.12 a       | 90.69 ± 3.22 b        | 145.55 ± 27.99 c     | ***              |
| 2-phenylethanol <sup>#</sup>                   | 3653.08 ± 8986.43 a        | 96266.39 ± 11810.16 d | 39566.73 ± 6789.78 b  | 53018.91 ± 756.81 c  | ***              |
| 2-ethylhexanol                                 | 27.67 ± 8.49 b             | 14.81 ± 2.48 a        | 14.98 ± 4.67 a        | 23.77 ± 2.02 ab      | **               |
| (E)-3-hexenol <sup>#</sup>                     | 25.11 ± 4.18 a             | 32.98 ± 8.44 b        | blq                   | blq                  | ***              |
| Diethyl succinate <sup>#</sup>                 | 52.22 ± 3.83 b             | 110.07 ± 11.37 c      | 57.75 ± 5.65 b        | 33.51 ± 2.13a        | ***              |
| Ethyl acetate <sup>#</sup>                     | 174446.57 ± 22014.86 c     | 29269.78 ± 11037.62 a | 63089.78 ± 5282.99 b  | 54177.89 ± 2612.33 b | ***              |
| Ethyl butanoate <sup>#</sup>                   | 160.54 ± 6.22 ab           | 194.31 ± 25.55 b      | 163.24 ± 28.44 ab     | 191.85 ± 3.44 b      | ***              |
| Ethyl decanoate <sup>#</sup>                   | 47.27 ± 13.3 ab            | 110.31 ± 23.36 c      | 63.75 ± 13.45 ab      | 43.49 ± 3.18 a       | ***              |
| Ethyl dodecanoate <sup>#</sup>                 | 24.62 ± 2.82 a             | 46.59 ± 2.04 c        | 37.93 ± 10.37 b       | 32.15 ± 2.86 ab      | ***              |
| Ethyl heptanoate <sup>#</sup>                  | 50.52 ± 12.29 c            | 21.12 ± 1.54 b        | 18.27 ± 0.2 ab        | 11.56 ± 0.85 ab      | ***              |
| Ethyl hexanoate <sup>#</sup>                   | 158.08 ± 8.66 abc          | 239.94 ± 18.63 d      | 179.96 ± 13.35 c      | 141.49 ± 0.75 a      | ***              |
| Ethyl lactate <sup>#</sup>                     | blq                        | blq                   | blq                   | 4163.19 ± 68.58 a    | ***              |
| Ethyl nonanoate <sup>#</sup>                   | 0.82 ± 0.09 b              | 0.75 ± 0.15 b         | 0.58 ± 0.1 bb         | 0.29 ± 0.01 a        | ***              |
| Ethyl octanoate <sup>#</sup>                   | 130.07 ± 11.9 a            | 239.74 ± 26.82 b      | 151.29 ± 19.54 a      | 125.54 ± 8.76 a      | ***              |
| (E/Z) - ethyl 2-hexenoate                      | 21.32 ± 3.06 bc            | 18.76 ± 1.52 b        | 23.32 ± 1.34 c        | 12.99 ± 0.8 a        | ***              |
| (E/Z) - ethyl-4-hexenoate                      | blq                        | blq                   | blq                   | blq                  | ***              |
| Ethyl 9-decenoate                              | 25.78 ± 2.08 b             | 26.14 ± 2.41 b        | 17.68 ± 1.67 a        | 18.63 ± 1.69 a       | ***              |
| Hexyl acetate <sup>#</sup>                     | 14.2 ± 0.85 a              | 10.51 ± 0.65 a        | 54.49 ± 7.65 b        | 12.34 ± 0.3 a        | ***              |
| Isoamyl acetate <sup>#</sup>                   | 873.44 ± 139.89 a          | 1256.76 ± 95.26 a     | 2341.26 ± 531.9 b     | 978.38 ± 18.84 a     | ***              |
| Methyl octanoate <sup>#</sup>                  | blq                        | 0.13 ± 0.01 a         | blq                   | blq                  | ***              |
| 2-phenylethyl acetate <sup>#</sup>             | 106.46 ± 18.22 a           | 242.77 ± 40.5 ab      | 916.08 ± 176.67 d     | 462.3 ± 206.09 c     | ***              |
| 3-methylbutyl octanoate                        | 15.26 ± 1.62 a             | 63.95 ± 17.67 b       | 14.26 ± 3.92 a        | blq                  | ***              |
| 3-methylbutyl propanoate                       | 19.21 ± 3.11 a             | 19 ± 1.65 a           | 19.04 ± 1.49 a        | 18.5 ± 0.9 a         | ***              |
| Ho-trienol                                     | 7.98 ± 1.65 b              | blq                   | 5.16 ± 0.2 a          | blq                  | ***              |
| (+/-)-β-citronellol                            | 16.15 ± 0.64 a             | 15.67 ± 3.48 a        | 20.71 ± 1.79 b        | 20.88 ± 0.55 b       | ***              |
| Linalool <sup>#</sup>                          | 3.51 ± 0.11 b              | 2.91 ± 0.26 a         | 8.5 ± 0.22 c          | 6.9 ± 0.25 c         | ***              |
| Hexanoic acid                                  | 29.4 ± 2.01 a              | 59.53 ± 6.6 c         | 41.67 ± 3.71 b        | 29.99 ± 2.15 a       | ***              |
| Methionol <sup>#</sup>                         | 2557.42 ± 189.83 b         | 6922.59 ± 611.4 c     | 1980.88 ± 92.23 a     | 2398.37 ± 126.05 ab  | ***              |
| trans-b-damascenone                            | 21.51 ± 2.08 ab            | 24.65 ± 4.94 b        | 21.2 ± 3.98 ab        | 17.41 ± 0.46 a       | ns               |
| (Z)-b-nerolidol                                | 16.39 ± 3.43               | 15.9 ± 2.05           | 13.3 ± 3.24           | 14.15 ± 0.94         | ns               |
| (Z)-dihydrofarnesol                            | 8.42 ± 1.72 a              | 17.72 ± 2.96 c        | 10.33 ± 2.11 b        | 8.45 ± 0.88 ab       | ***              |
| 2,3-dihydrobenzofuran                          | 90.73 ± 20.51              | 93.43 ± 11.69         | 89.76 ± 12.84         | 78.29 ± 3.44         | ns               |

**Supplemental Data for:**

Englezos V, Di Gianvito P, Peyer L, Giacosa S, Río Segade S, Edwards N, Rolle L, Rantsiou K and Cocolin L. Bioprotective effect of *Pichia kluyveri* and *Lactiplantibacillus plantarum* in winemaking conditions. Am J Enol Vitic 73:294-307.  
doi: 10.5344/ajev.2022.22008.

---

---

<sup>a</sup>Values are expressed as mean ± standard deviation of three independent replicates.

<sup>b</sup>\*, \*\*\*, and NS indicate significance at  $p < 0.05$ ,  $<0.001$ , and not significant, respectively. Sugars concentration before fermentation: 236 g/L (glucose 120 g/L, fructose 122 g/L). Values are expressed as mean ± standard deviation of three independent replicates.

<sup>c</sup>Different letters in the same column indicate significant difference at  $p < 0.05$  (Tukey's honest significant difference test).

<sup>d</sup>Glycerol yield: glycerol production/sugar consumption.

<sup>e</sup>Ethanol yield: ethanol production/sugar consumption.

<sup>f</sup>mg/L as malvidin-3-*O*-glucoside chloride.

<sup>g</sup>mg/L as (+)-catechin.

<sup>h</sup>OP, optical path.

<sup>i</sup>blq, below quantitation limit.

<sup>j</sup>Concentrations of compounds identified with a # was calculated by a calibration with standard solutions analyzed under the same conditions as the wine samples. The other volatile compounds were semi-quantified in relation to a 1-heptanol internal standard.

**Supplemental Data for:**

Englezos V, Di Gianvito P, Peyer L, Giacosa S, Río Segade S, Edwards N, Rolle L, Rantsiou K and Cocolin L. Bioprotective effect of *Pichia kluyveri* and *Lactiplantibacillus plantarum* in winemaking conditions. Am J Enol Vitic 73:294-307. doi: 10.5344/ajev.2022.22008.

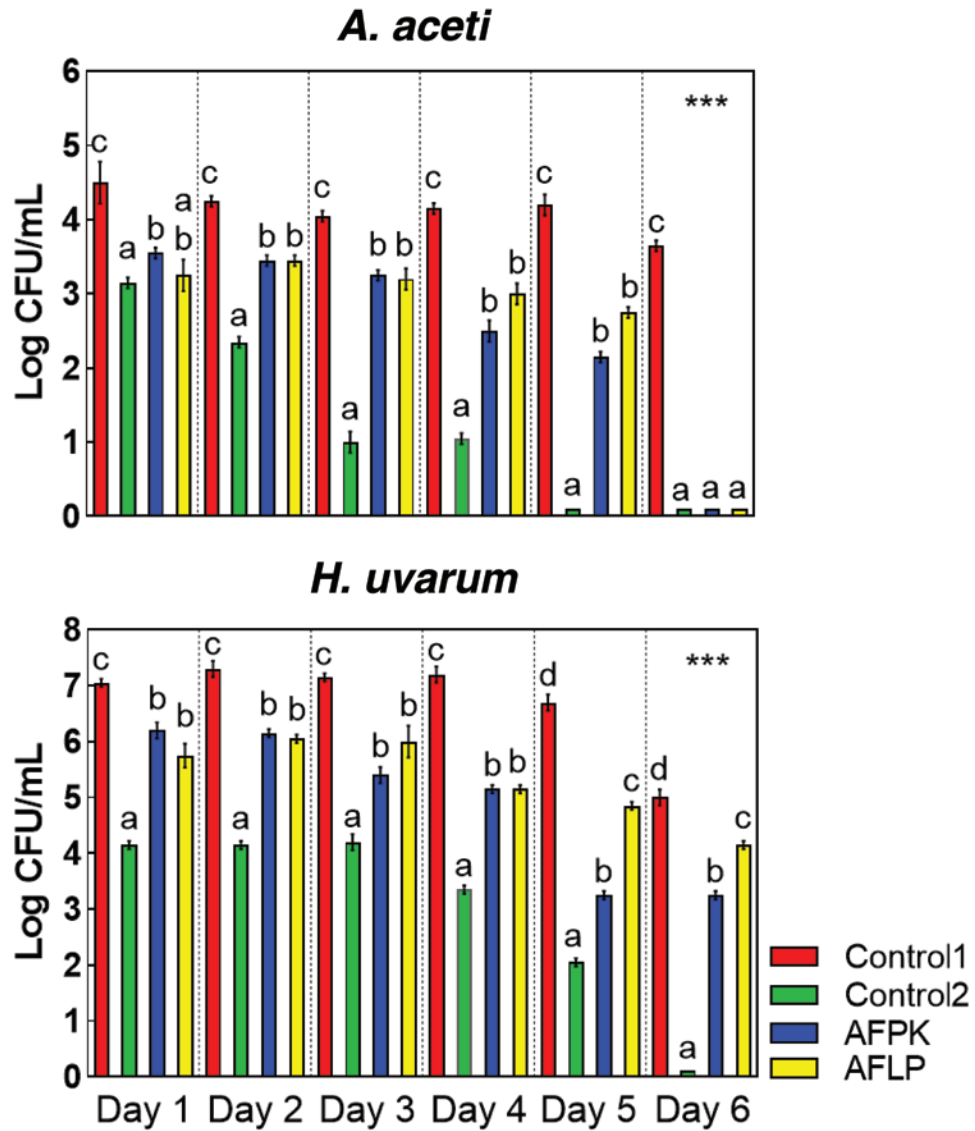

**Supplemental Figure 1** Viable counts (log CFU/mL) of *Acetobacter aceti* and *Hanseniaspora uvarum* populations during fermentation (2019 vintage). Data are the means  $\pm$  standard deviation of three independent experiments. Different letters in each column indicate significant differences according to analysis of variance and Tukey's honest significant difference test ( $p < 0.001$ ).

**Supplemental Data for:**

Englezos V, Di Gianvito P, Peyer L, Giacosa S, Río Segade S, Edwards N, Rolle L, Rantsiou K and Cocolin L. Bioprotective effect of *Pichia kluyveri* and *Lactiplantibacillus plantarum* in winemaking conditions. Am J Enol Vitic 73:294-307. doi: 10.5344/ajev.2022.22008.

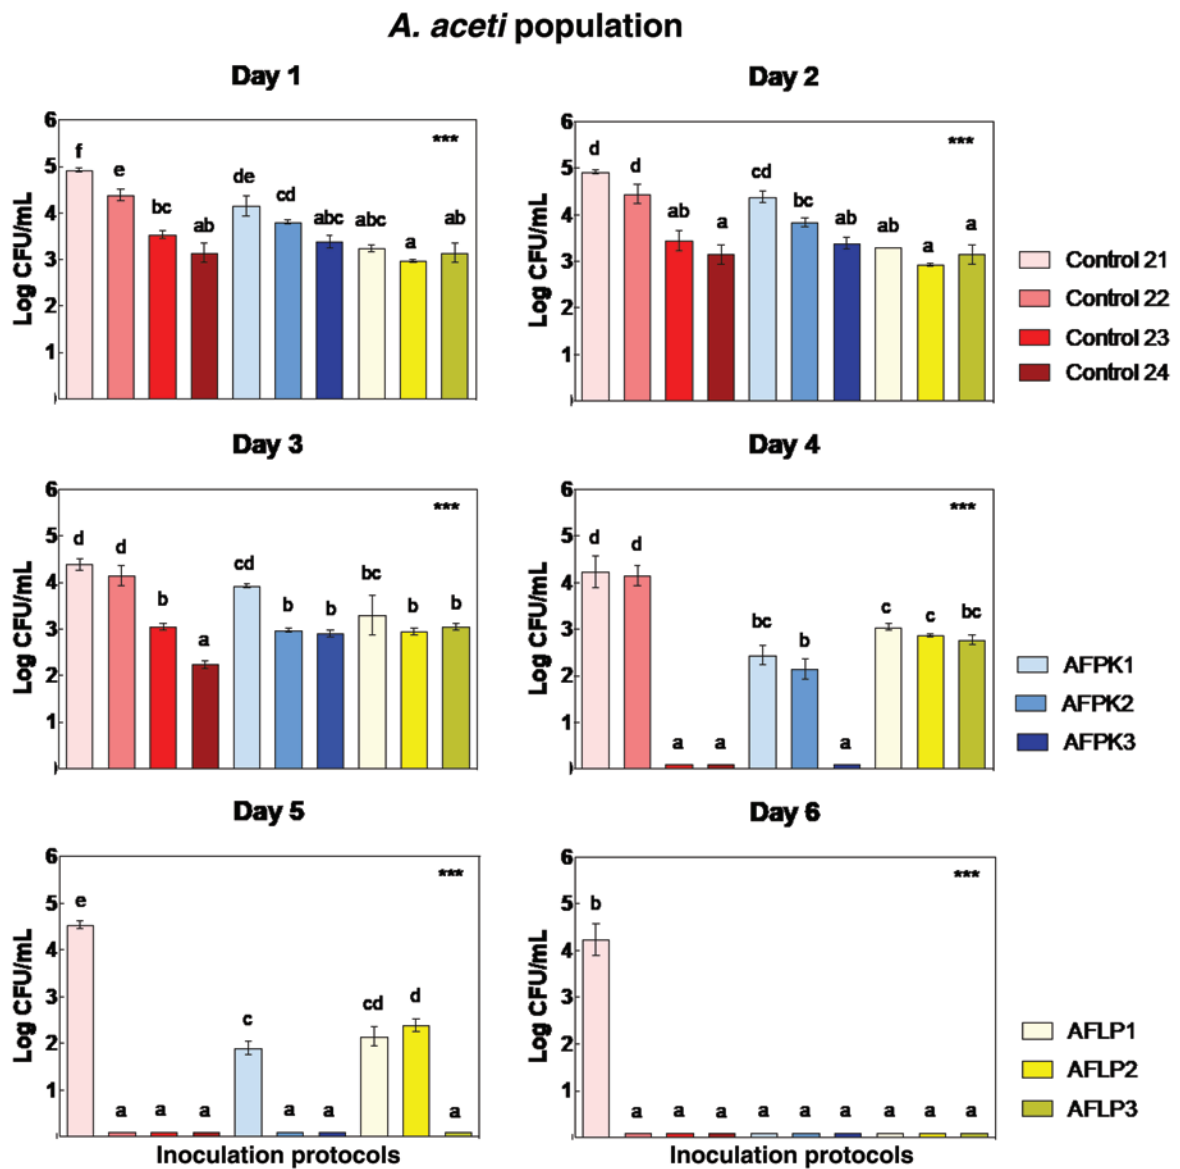

**Supplemental Figure 2** Viable counts (log CFU/mL) of *Acetobacter aceti* populations during fermentation (2020 vintage). Inoculation protocols are indicated in the symbol key. Data are the means  $\pm$  standard deviation of three independent biological experiments. Different letters in each column indicate significant differences according to analysis of variance and Tukey's honest significant difference test ( $p < 0.001$ ).

**Supplemental Data for:**

Englezos V, Di Gianvito P, Peyer L, Giacosa S, Río Segade S, Edwards N, Rolle L, Rantsiou K and Cocolin L. Bioprotective effect of *Pichia kluyveri* and *Lactiplantibacillus plantarum* in winemaking conditions. Am J Enol Vitic 73:294-307. doi: 10.5344/ajev.2022.22008.

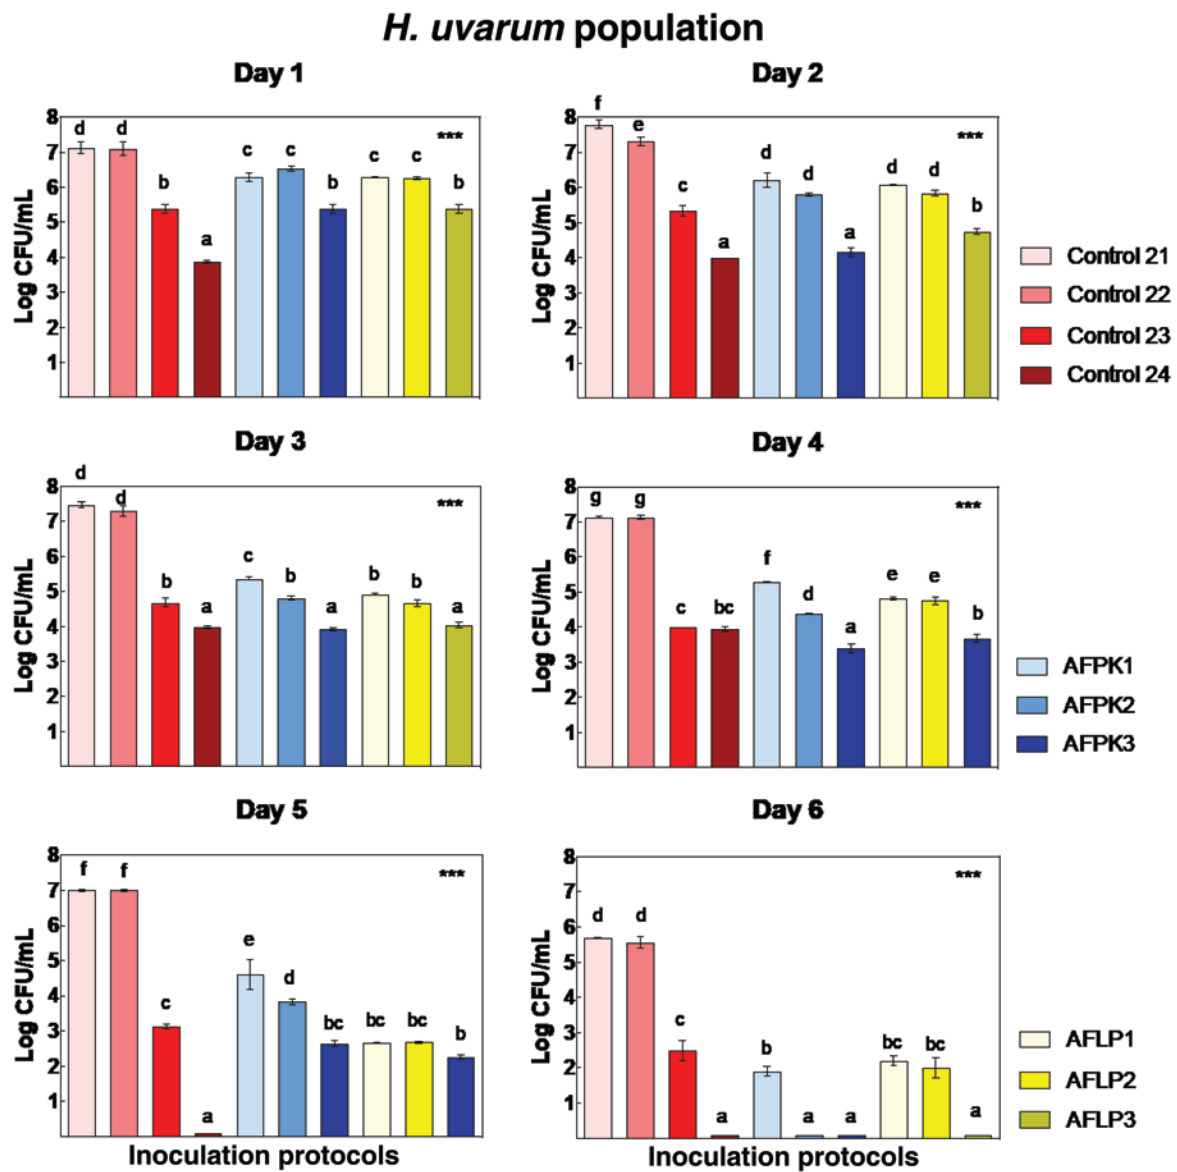

**Supplemental Figure 3** Viable counts (log CFU/mL) of *Hanseniaspora uvarum* populations during fermentation (2020 vintage). Inoculation protocols are indicated in the symbol key. Data are the means  $\pm$  standard deviation of three independent biological experiments. Different letters in each column indicate significant differences according to analysis of variance and Tukey's honest significant difference test ( $p < 0.001$ ).
